# Supplementary material for: Social, Economic, and Regional Determinants of Mortality in Hospitalized Patients With COVID-19 in Brazil
Source: PubMed Central journal article supplement (PMC9008306; doi:10.3389/fpubh.2022.856137), 2022-03-31
Supplement: Data_Sheet_1.pdf [file Data_Sheet_1.pdf]

## Supplementary Material

### 1 Supplementary Data

#### 1.1 Hypothesis tests results

##### Macro-regions

The test shows that there were more deaths in the Northern macro-region.

\*Consider N for Northern and S for Central-South macro-region.

| Source          | DF     | Sum of Squares | Mean Square | F Value | Pr > F |
|-----------------|--------|----------------|-------------|---------|--------|
| Model           | 1      | 1365.3510      | 1365.3510   | 5755.17 | <.0001 |
| Error           | 840199 | 199328.1249    | 0.2372      |         |        |
| Corrected Total | 840200 | 200693.4760    |             |         |        |

| R-Square | Coeff Var | Root MSE | deaths Mean |
|----------|-----------|----------|-------------|
| 0.006803 | 123.4747  | 0.487072 | 0.394471    |

| Source       | DF | Anova SS    | Mean Square | F Value | Pr > F |
|--------------|----|-------------|-------------|---------|--------|
| macro_region | 1  | 1365.351033 | 1365.351033 | 5755.17 | <.0001 |

#### The ANOVA Procedure

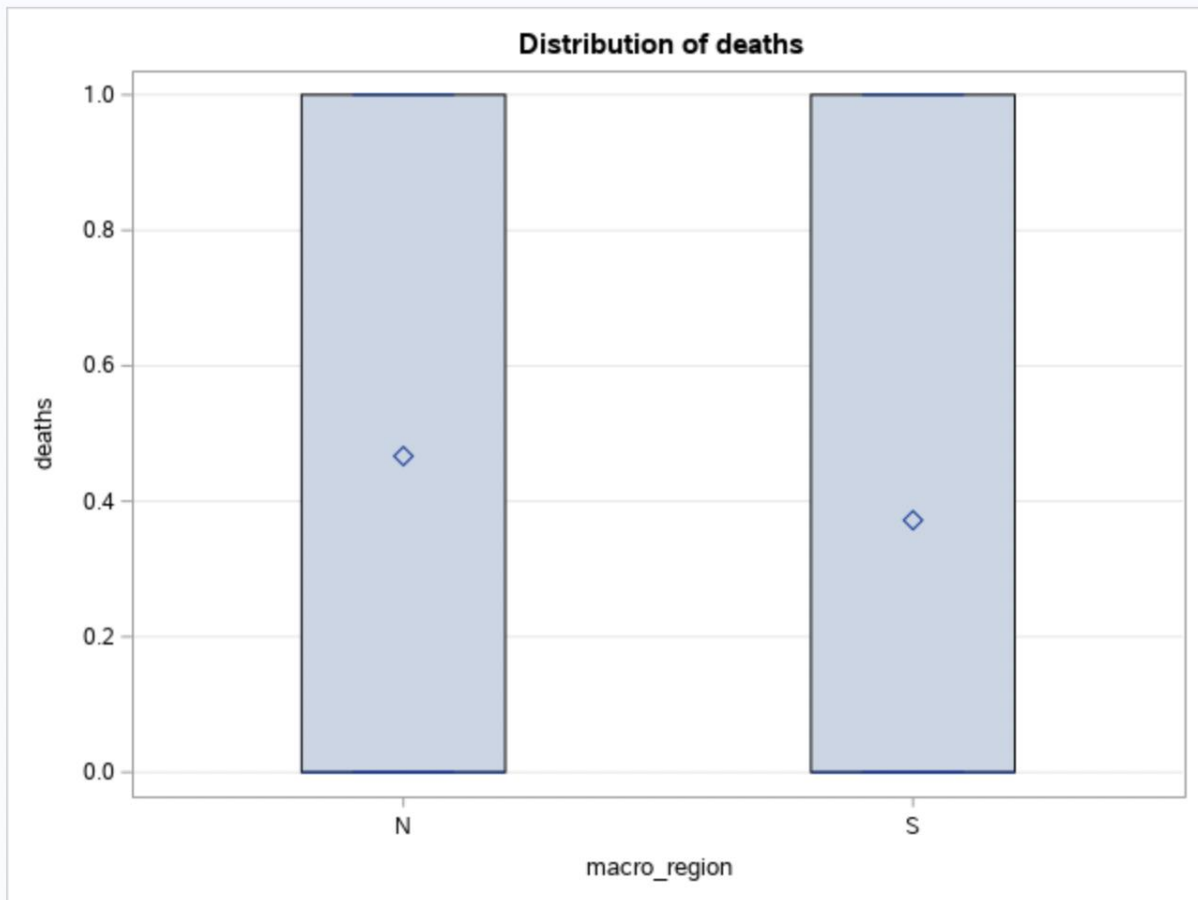

Supplementary Figure 1 Difference between Macro-regions Central-South and North

### Ethnicity

The test shows that there were higher proportions of black ethnicities in deaths in the Central-South region.

\*Consider the following values to each ethnicity:

- 1: White
- 2: Black
- 3: Asian
- 4: Mixed-race
- 5: Indigenous

| Source          | DF     | Sum of Squares | Mean Square | F Value | Pr > F |
|-----------------|--------|----------------|-------------|---------|--------|
| Model           | 4      | 142.8372       | 35.7093     | 153.00  | <.0001 |
| Error           | 640911 | 149584.1785    | 0.2334      |         |        |
| Corrected Total | 640915 | 149727.0157    |             |         |        |

| R-Square | Coeff Var | Root MSE | deaths Mean |
|----------|-----------|----------|-------------|
| 0.000954 | 129.8703  | 0.483108 | 0.371993    |

| Source          | DF | Anova SS    | Mean Square | F Value | Pr > F |
|-----------------|----|-------------|-------------|---------|--------|
| Ethnicity_South | 4  | 142.8372286 | 35.7093071  | 153.00  | <.0001 |

#### The ANOVA Procedure

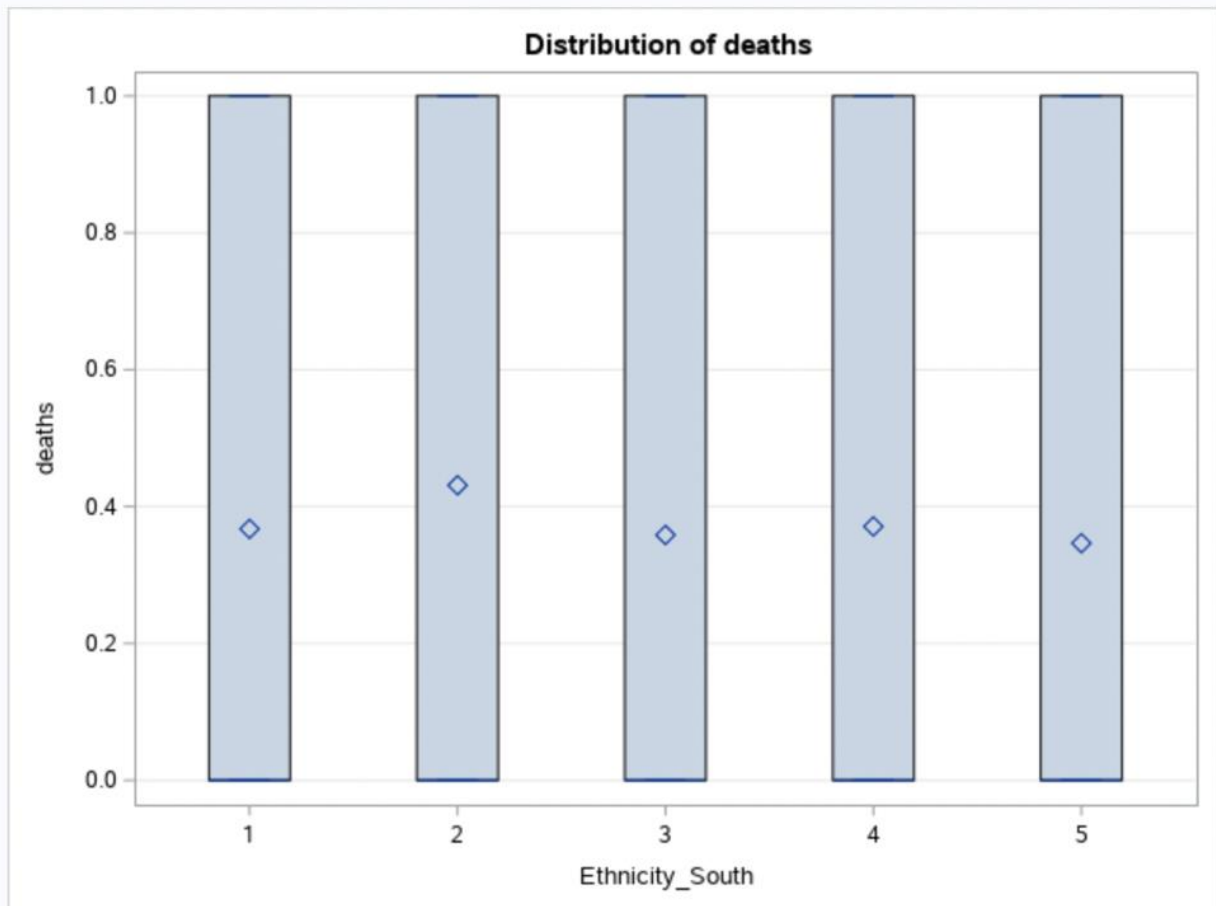

Supplementary Figure 2 Deaths by ethnicity

**Tukey test results:**

| <b>Comparisons significant at the 0.05 level are indicated by ***.</b> |                                 |                                           |          |     |
|------------------------------------------------------------------------|---------------------------------|-------------------------------------------|----------|-----|
| <b>Ethnicity_South Comparison</b>                                      | <b>Difference Between Means</b> | <b>Simultaneous 95% Confidence Limits</b> |          |     |
| Black – Mixed-race                                                     | 0.060059                        | 0.052622                                  | 0.067495 | *** |
| Black – White                                                          | 0.063802                        | 0.056705                                  | 0.070899 | *** |
| Black – Asian                                                          | 0.072630                        | 0.056051                                  | 0.089209 | *** |
| Black – Indigenous                                                     | 0.084632                        | 0.043247                                  | 0.126017 | *** |
| Mixed-race – White                                                     | 0.003743                        | 0.000070                                  | 0.007416 | *** |
| Mixed-race – Asian                                                     | 0.012571                        | -0.002855                                 | 0.027998 |     |
| Mixed-race – Indigenous                                                | 0.024573                        | -0.016364                                 | 0.065510 |     |
| White – Asian                                                          | 0.008828                        | -0.006438                                 | 0.024094 |     |
| White – Indigenous                                                     | 0.020830                        | -0.020047                                 | 0.061707 |     |
| Asian – Mixed-race                                                     | -0.012571                       | -0.027998                                 | 0.002855 |     |
| Asian – White                                                          | -0.008828                       | -0.024094                                 | 0.006438 |     |
| Asian – Indigenous                                                     | 0.012002                        | -0.031535                                 | 0.055538 |     |

**Supplementary Table 1 Tukey test results**

### Age

The test shows that the older patients had a greater mortality, especially in the North.

\*Consider 0 representing patients under 51-year-old and 1 representing patients equal or over 51-year-old.

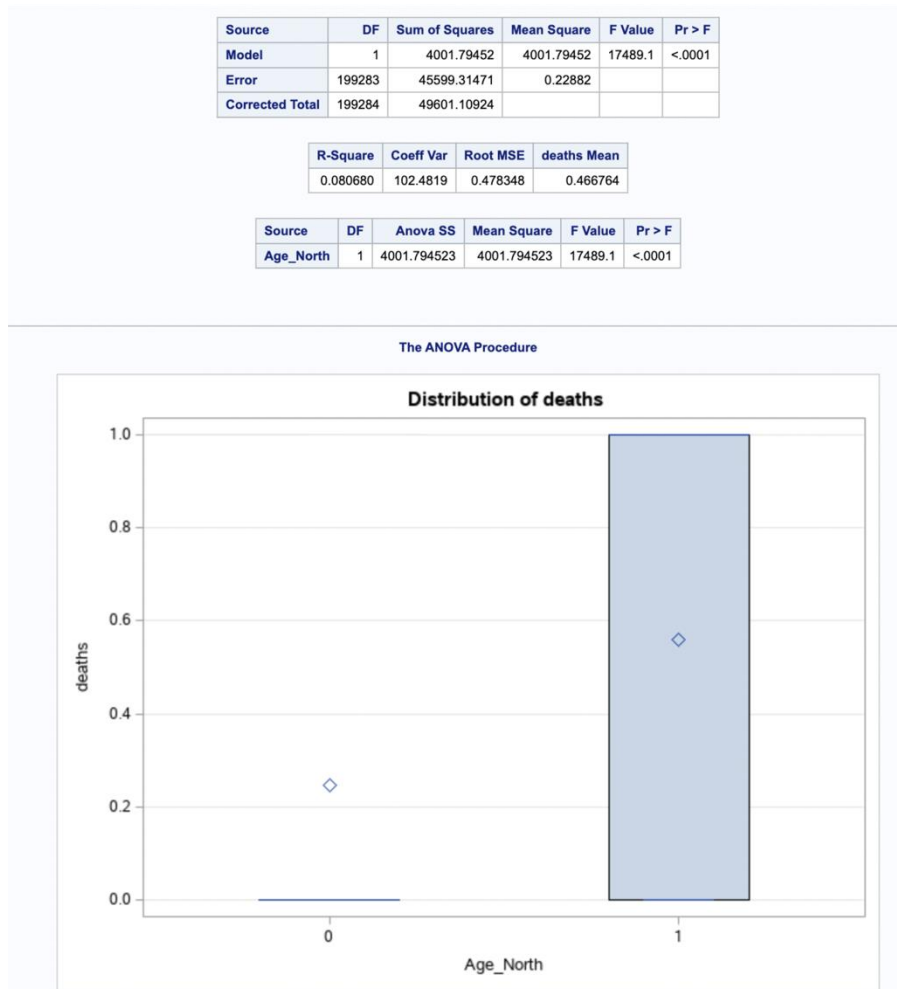

**Supplementary Figure 3 Mortality in Northern macro-region by age**

| Source          | DF     | Sum of Squares | Mean Square | F Value | Pr > F |
|-----------------|--------|----------------|-------------|---------|--------|
| Model           | 1      | 10442.3395     | 10442.3395  | 48050.1 | <.0001 |
| Error           | 640914 | 139284.6762    | 0.2173      |         |        |
| Corrected Total | 640915 | 149727.0157    |             |         |        |

| R-Square | Coeff Var | Root MSE | deaths Mean |
|----------|-----------|----------|-------------|
| 0.069743 | 125.3192  | 0.466178 | 0.371993    |

| Source    | DF | Anova SS    | Mean Square | F Value | Pr > F |
|-----------|----|-------------|-------------|---------|--------|
| Age_South | 1  | 10442.33955 | 10442.33955 | 48050.1 | <.0001 |

The ANOVA Procedure

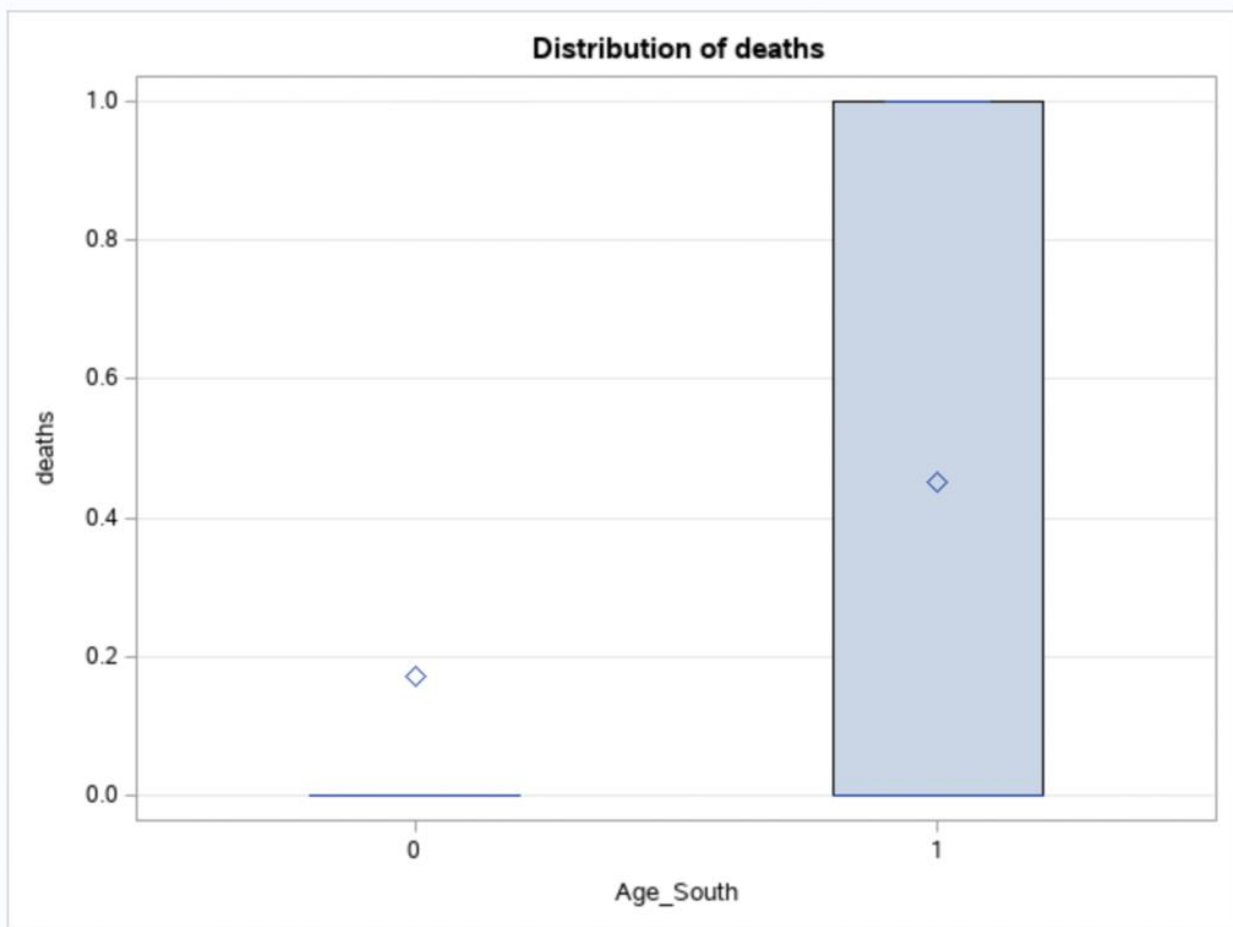

Supplementary Figure 4 Mortality in Central-South macro-region by age

**Comorbidities**

The test shows that there were more deaths in the North in all comorbidities.

\*Consider 0 representing Central-South and 1 representing North macro-region.

| Source          | DF     | Sum of Squares | Mean Square | F Value | Pr > F |
|-----------------|--------|----------------|-------------|---------|--------|
| Model           | 1      | 555.0144       | 555.0144    | 2330.00 | <.0001 |
| Error           | 840199 | 200138.4615    | 0.2382      |         |        |
| Corrected Total | 840200 | 200693.4760    |             |         |        |

| R-Square | Coeff Var | Root MSE | death Mean |
|----------|-----------|----------|------------|
| 0.002765 | 123.7254  | 0.488061 | 0.394471   |

| Source | DF | Anova SS    | Mean Square | F Value | Pr > F |
|--------|----|-------------|-------------|---------|--------|
| renal  | 1  | 555.0144454 | 555.0144454 | 2330.00 | <.0001 |

The ANOVA Procedure

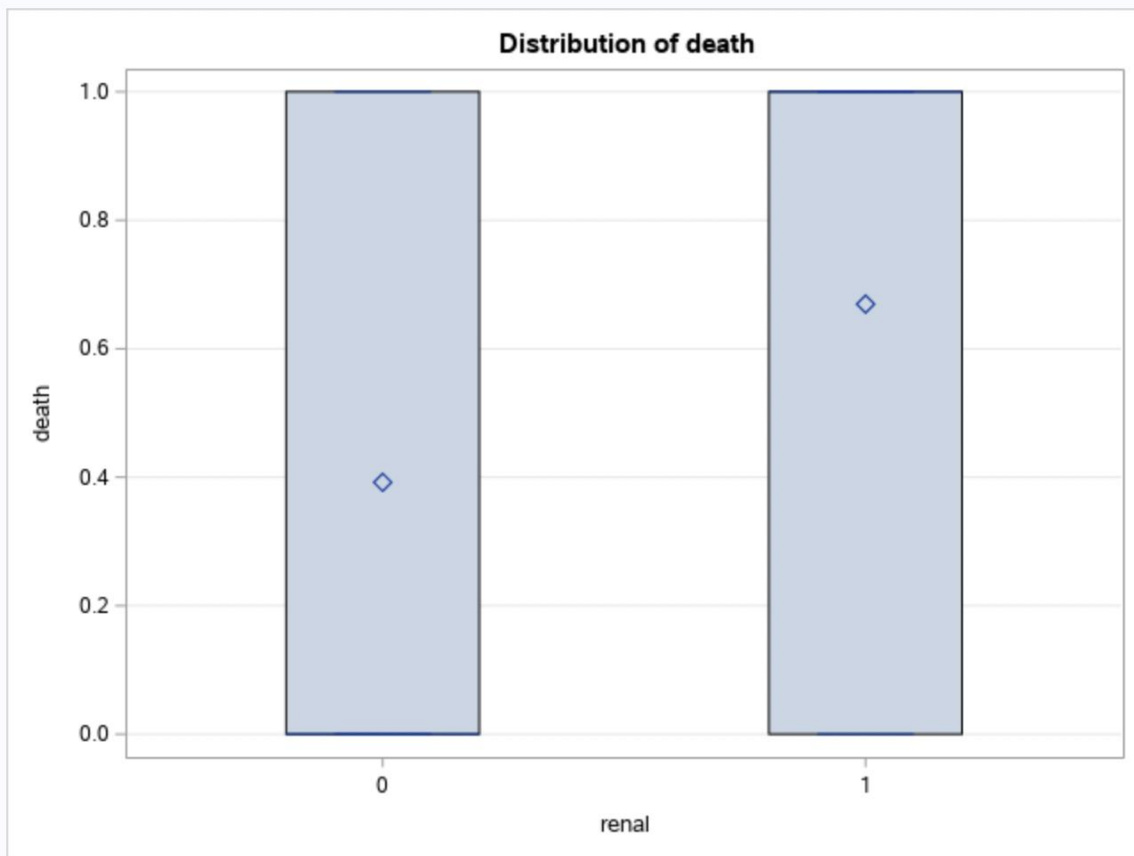

Supplementary Figure 5 Renal disease anova test

| Source          | DF     | Sum of Squares | Mean Square | F Value | Pr > F |
|-----------------|--------|----------------|-------------|---------|--------|
| Model           | 1      | 631.5789       | 631.5789    | 2652.44 | <.0001 |
| Error           | 840199 | 200061.8971    | 0.2381      |         |        |
| Corrected Total | 840200 | 200693.4760    |             |         |        |

| R-Square | Coeff Var | Root MSE | death Mean |
|----------|-----------|----------|------------|
| 0.003147 | 123.7018  | 0.487968 | 0.394471   |

| Source | DF | Anova SS    | Mean Square | F Value | Pr > F |
|--------|----|-------------|-------------|---------|--------|
| Liver  | 1  | 631.5788973 | 631.5788973 | 2652.44 | <.0001 |

### The ANOVA Procedure

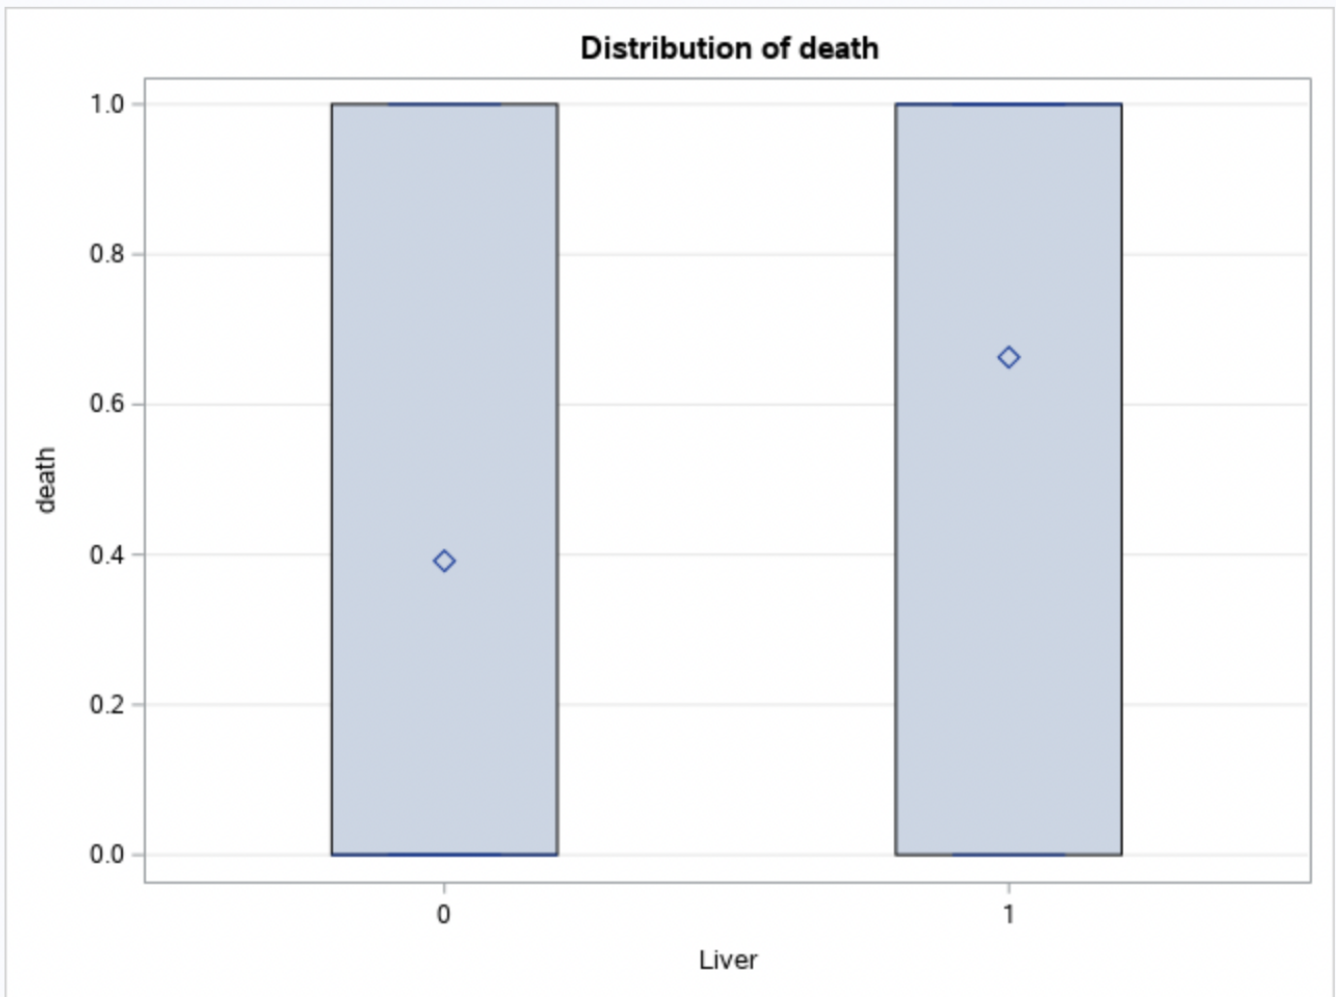

Supplementary Figure 6 Liver disease anova test

| Source                 | DF     | Sum of Squares | Mean Square | F Value | Pr > F |
|------------------------|--------|----------------|-------------|---------|--------|
| <b>Model</b>           | 1      | 129.5317       | 129.5317    | 542.63  | <.0001 |
| <b>Error</b>           | 840199 | 200563.9443    | 0.2387      |         |        |
| <b>Corrected Total</b> | 840200 | 200693.4760    |             |         |        |

| R-Square | Coeff Var | Root MSE | death Mean |
|----------|-----------|----------|------------|
| 0.000645 | 123.8569  | 0.488580 | 0.394471   |

| Source                   | DF | Anova SS    | Mean Square | F Value | Pr > F |
|--------------------------|----|-------------|-------------|---------|--------|
| <b>Immunosuppression</b> | 1  | 129.5317117 | 129.5317117 | 542.63  | <.0001 |

The ANOVA Procedure

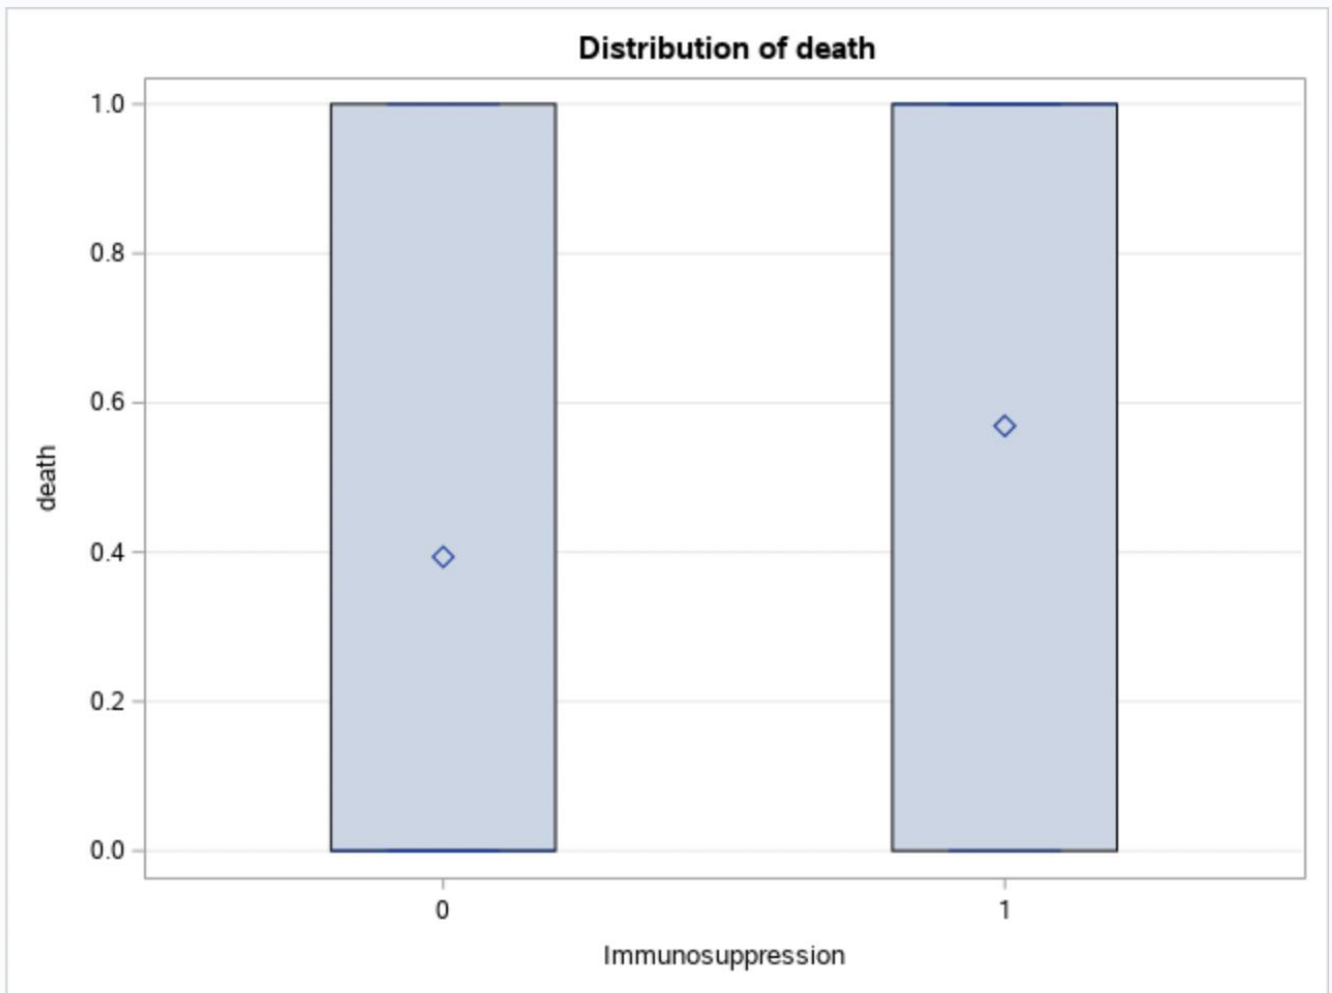

Supplementary Figure 7 Immunosuppression disease anova test



| Source          | DF     | Sum of Squares | Mean Square | F Value | Pr > F |
|-----------------|--------|----------------|-------------|---------|--------|
| Model           | 1      | 210.0553       | 210.0553    | 880.31  | <.0001 |
| Error           | 840199 | 200483.4206    | 0.2386      |         |        |
| Corrected Total | 840200 | 200693.4760    |             |         |        |

| R-Square | Coeff Var | Root MSE | death Mean |
|----------|-----------|----------|------------|
| 0.001047 | 123.8320  | 0.488482 | 0.394471   |

| Source  | DF | Anova SS    | Mean Square | F Value | Pr > F |
|---------|----|-------------|-------------|---------|--------|
| obesity | 1  | 210.0553463 | 210.0553463 | 880.31  | <.0001 |

The ANOVA Procedure

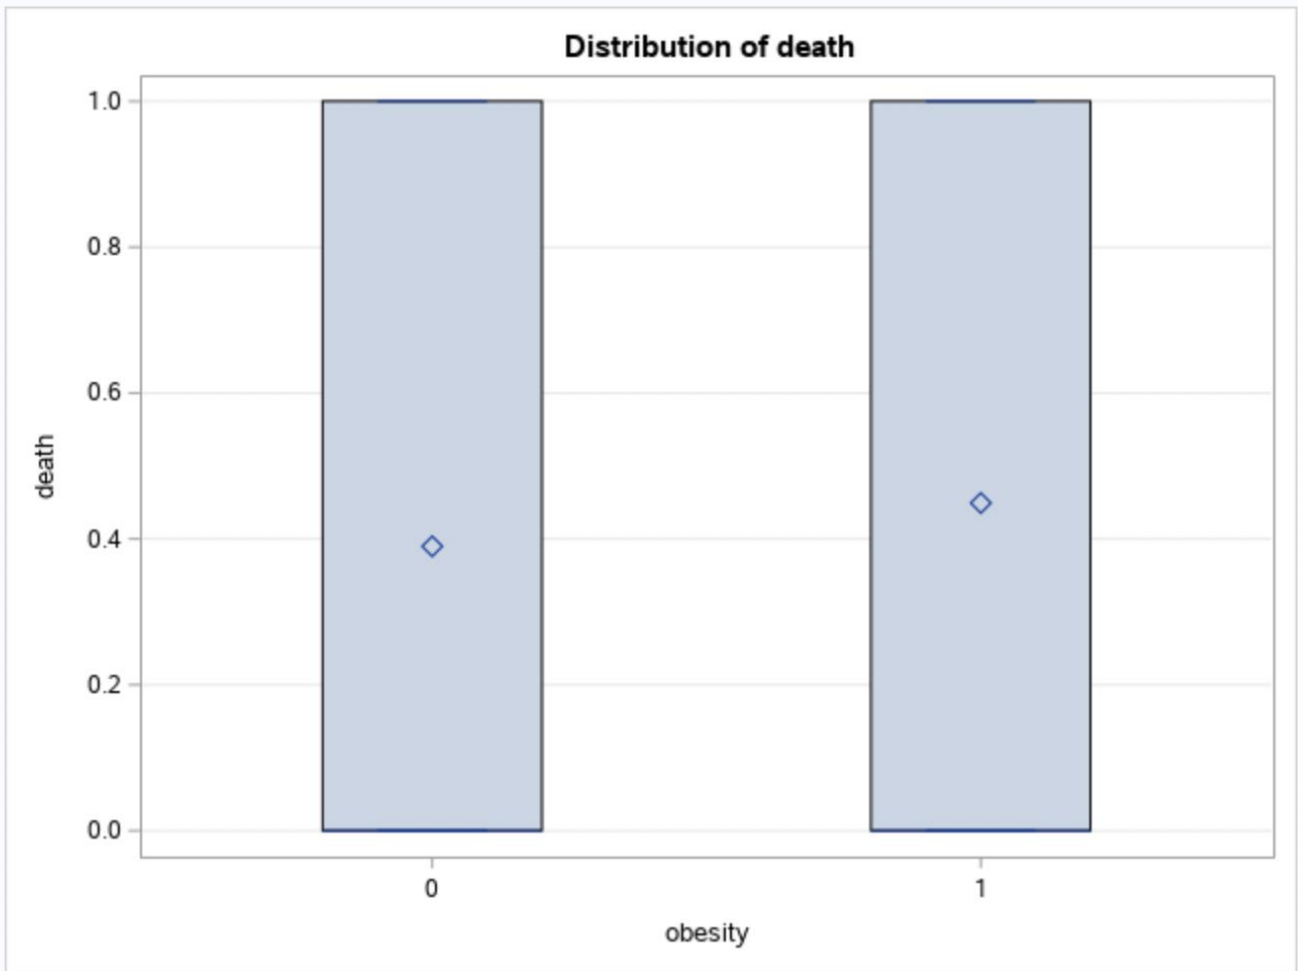

Supplementary Figure 8 Obesity anova test

| Source                 | DF     | Sum of Squares | Mean Square | F Value | Pr > F |
|------------------------|--------|----------------|-------------|---------|--------|
| <b>Model</b>           | 1      | 296.2204       | 296.2204    | 1241.95 | <.0001 |
| <b>Error</b>           | 840199 | 200397.2556    | 0.2385      |         |        |
| <b>Corrected Total</b> | 840200 | 200693.4760    |             |         |        |

| R-Square | Coeff Var | Root MSE | death Mean |
|----------|-----------|----------|------------|
| 0.001476 | 123.8054  | 0.488377 | 0.394471   |

| Source              | DF | Anova SS    | Mean Square | F Value | Pr > F |
|---------------------|----|-------------|-------------|---------|--------|
| <b>Neurological</b> | 1  | 296.2204038 | 296.2204038 | 1241.95 | <.0001 |

The ANOVA Procedure

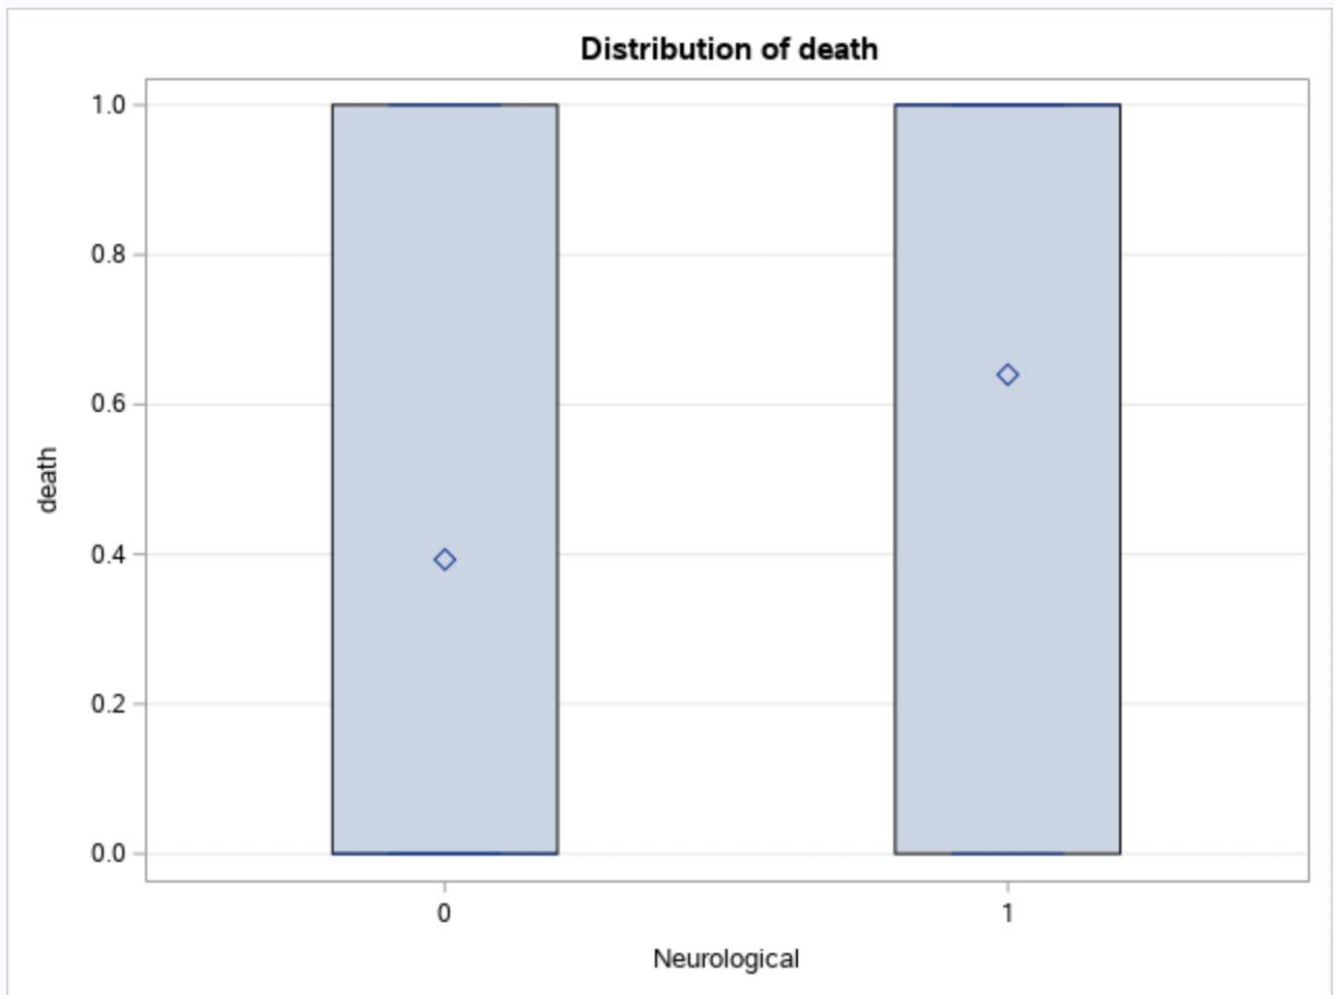

Supplementary Figure 9 Neurological disease anova test

| Source                 | DF     | Sum of Squares | Mean Square | F Value | Pr > F |
|------------------------|--------|----------------|-------------|---------|--------|
| <b>Model</b>           | 1      | 286.8598       | 286.8598    | 1202.65 | <.0001 |
| <b>Error</b>           | 840199 | 200406.6161    | 0.2385      |         |        |
| <b>Corrected Total</b> | 840200 | 200693.4760    |             |         |        |

| R-Square | Coeff Var | Root MSE | death Mean |
|----------|-----------|----------|------------|
| 0.001429 | 123.8083  | 0.488388 | 0.394471   |

| Source           | DF | Anova SS    | Mean Square | F Value | Pr > F |
|------------------|----|-------------|-------------|---------|--------|
| <b>Pulmonary</b> | 1  | 286.8598372 | 286.8598372 | 1202.65 | <.0001 |

The ANOVA Procedure

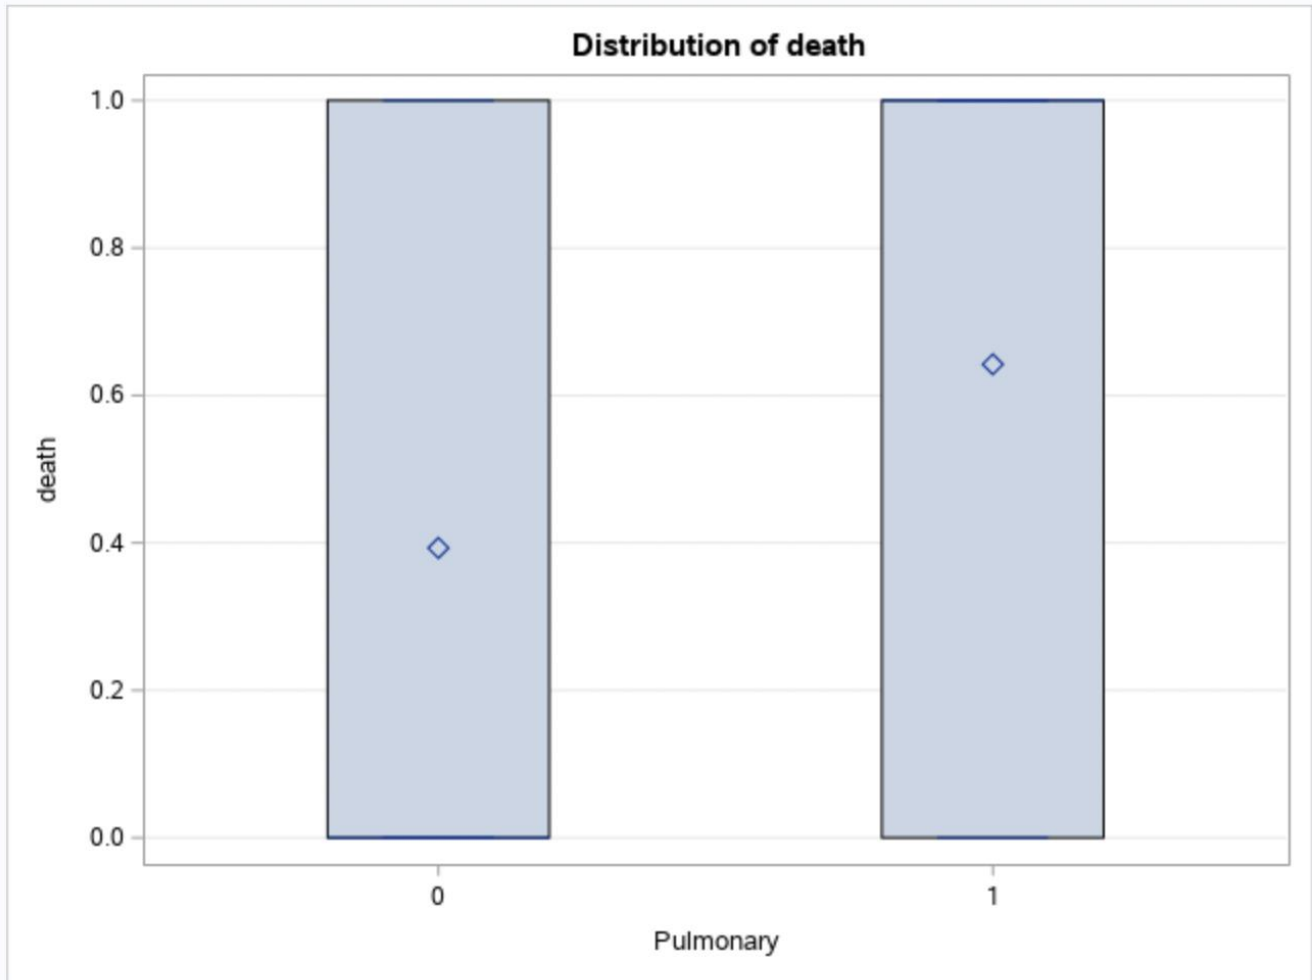

Supplementary Figure 10 Pulmonary disease anova test

| Source                 | DF     | Sum of Squares | Mean Square | F Value | Pr > F |
|------------------------|--------|----------------|-------------|---------|--------|
| <b>Model</b>           | 1      | 31.9240        | 31.9240     | 133.67  | <.0001 |
| <b>Error</b>           | 840199 | 200661.5520    | 0.2388      |         |        |
| <b>Corrected Total</b> | 840200 | 200693.4760    |             |         |        |

| R-Square | Coeff Var | Root MSE | death Mean |
|----------|-----------|----------|------------|
| 0.000159 | 123.8870  | 0.488698 | 0.394471   |

| Source             | DF | Anova SS    | Mean Square | F Value | Pr > F |
|--------------------|----|-------------|-------------|---------|--------|
| <b>Hematologic</b> | 1  | 31.92398222 | 31.92398222 | 133.67  | <.0001 |

The ANOVA Procedure

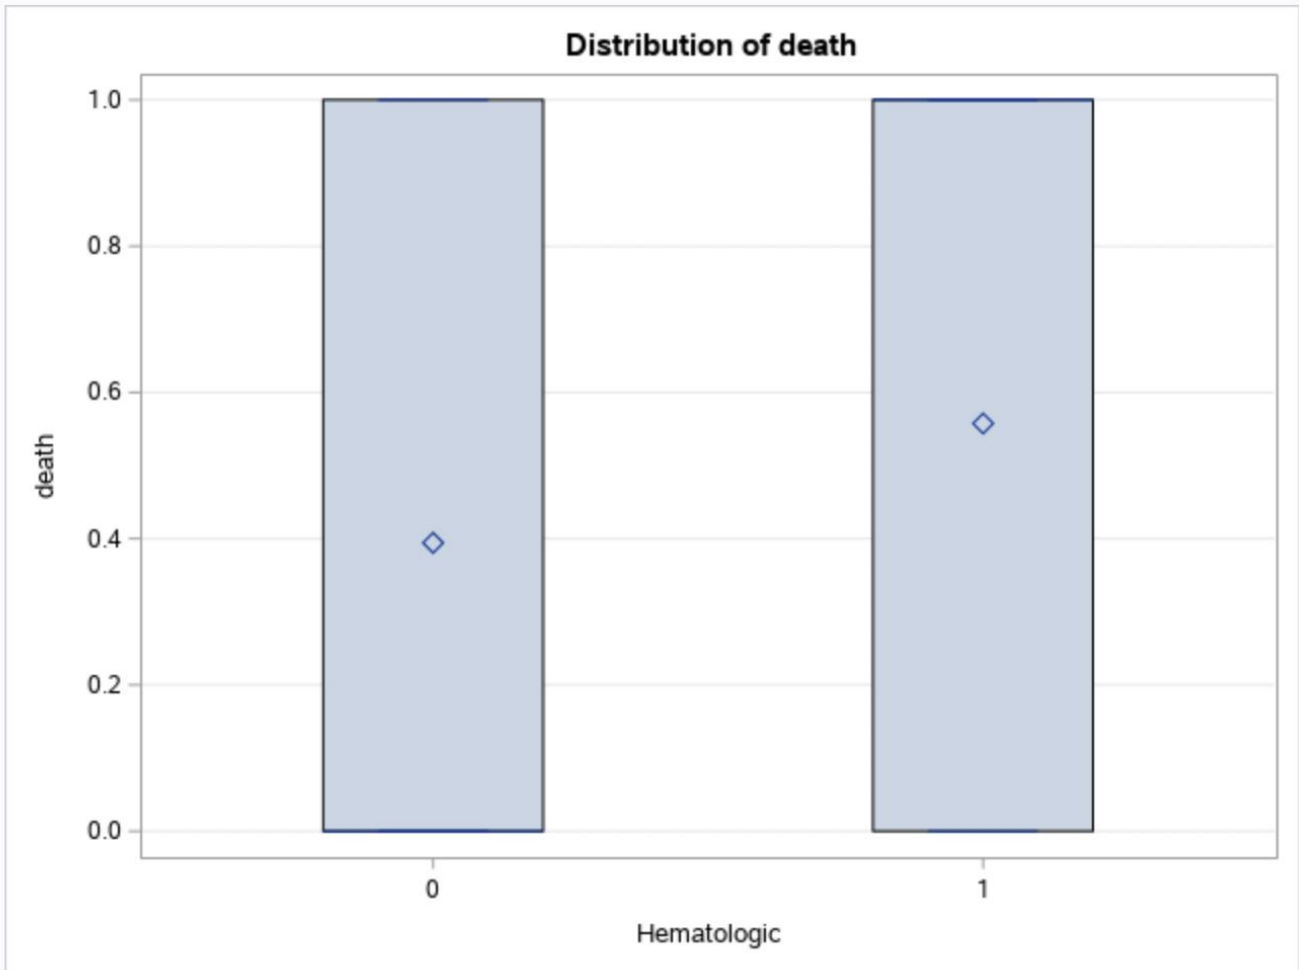

Supplementary Figure 11 Hematologic disease anova test

| Source                 | DF     | Sum of Squares | Mean Square | F Value | Pr > F |
|------------------------|--------|----------------|-------------|---------|--------|
| <b>Model</b>           | 1      | 1346.3941      | 1346.3941   | 5674.72 | <.0001 |
| <b>Error</b>           | 840199 | 199347.0819    | 0.2373      |         |        |
| <b>Corrected Total</b> | 840200 | 200693.4760    |             |         |        |

| R-Square | Coeff Var | Root MSE | death Mean |
|----------|-----------|----------|------------|
| 0.006709 | 123.4806  | 0.487095 | 0.394471   |

| Source          | DF | Anova SS    | Mean Square | F Value | Pr > F |
|-----------------|----|-------------|-------------|---------|--------|
| <b>diabetes</b> | 1  | 1346.394087 | 1346.394087 | 5674.72 | <.0001 |

The ANOVA Procedure

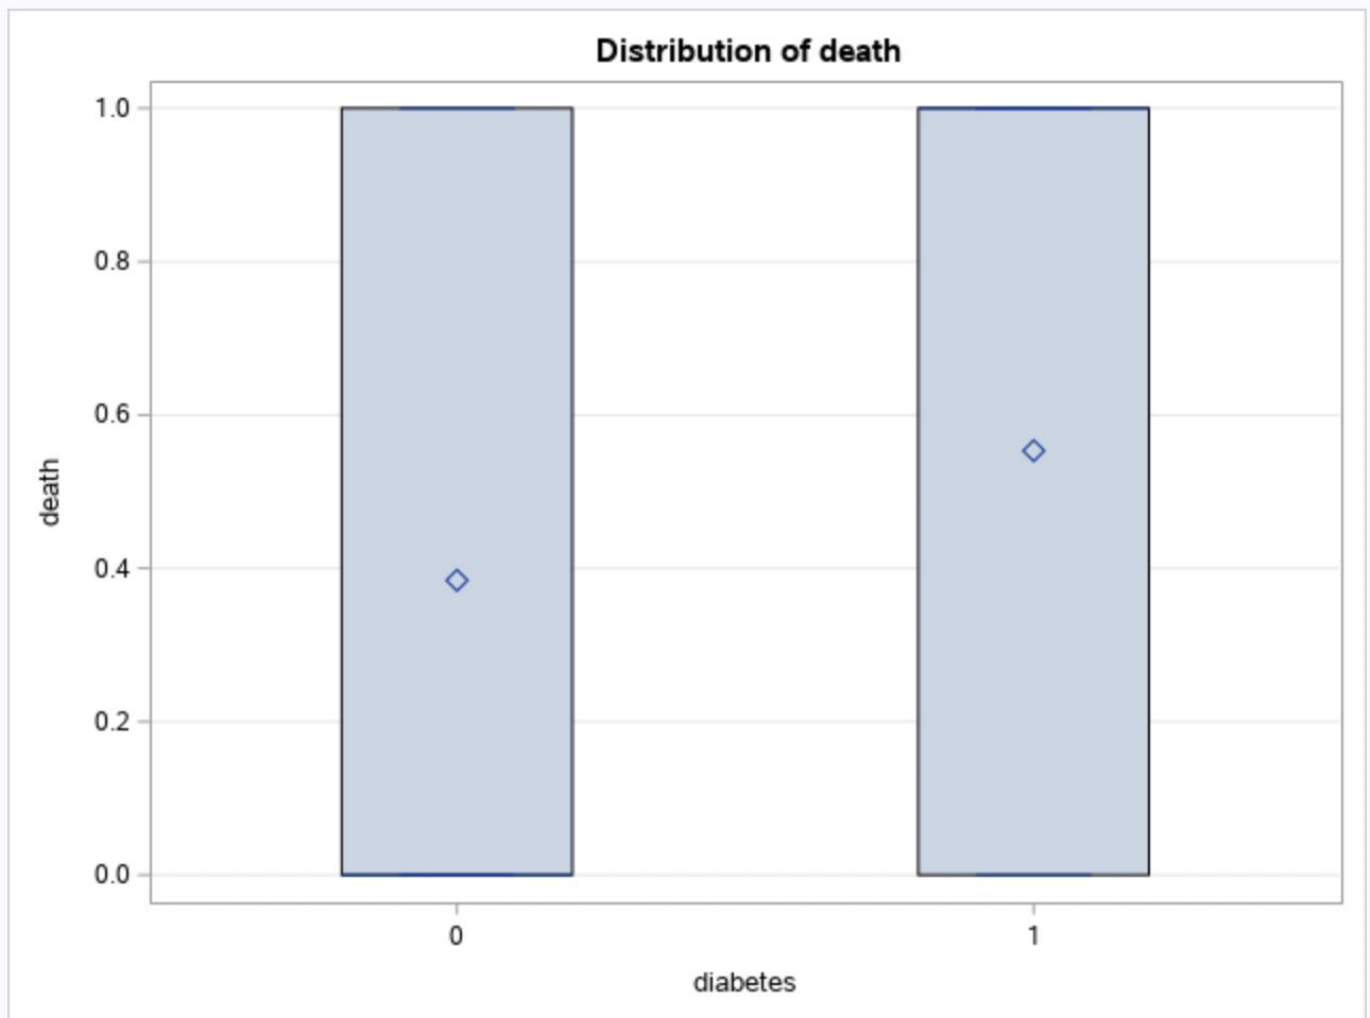

Supplementary Figure 12 Diabetes anova test

| Source          | DF     | Sum of Squares | Mean Square | F Value | Pr > F |
|-----------------|--------|----------------|-------------|---------|--------|
| Model           | 1      | 1594.5487      | 1594.5487   | 6729.01 | <.0001 |
| Error           | 840199 | 199098.9273    | 0.2370      |         |        |
| Corrected Total | 840200 | 200693.4760    |             |         |        |

| R-Square | Coeff Var | Root MSE | death Mean |
|----------|-----------|----------|------------|
| 0.007945 | 123.4037  | 0.486792 | 0.394471   |

| Source         | DF | Anova SS    | Mean Square | F Value | Pr > F |
|----------------|----|-------------|-------------|---------|--------|
| Cardiovascular | 1  | 1594.548717 | 1594.548717 | 6729.01 | <.0001 |

The ANOVA Procedure

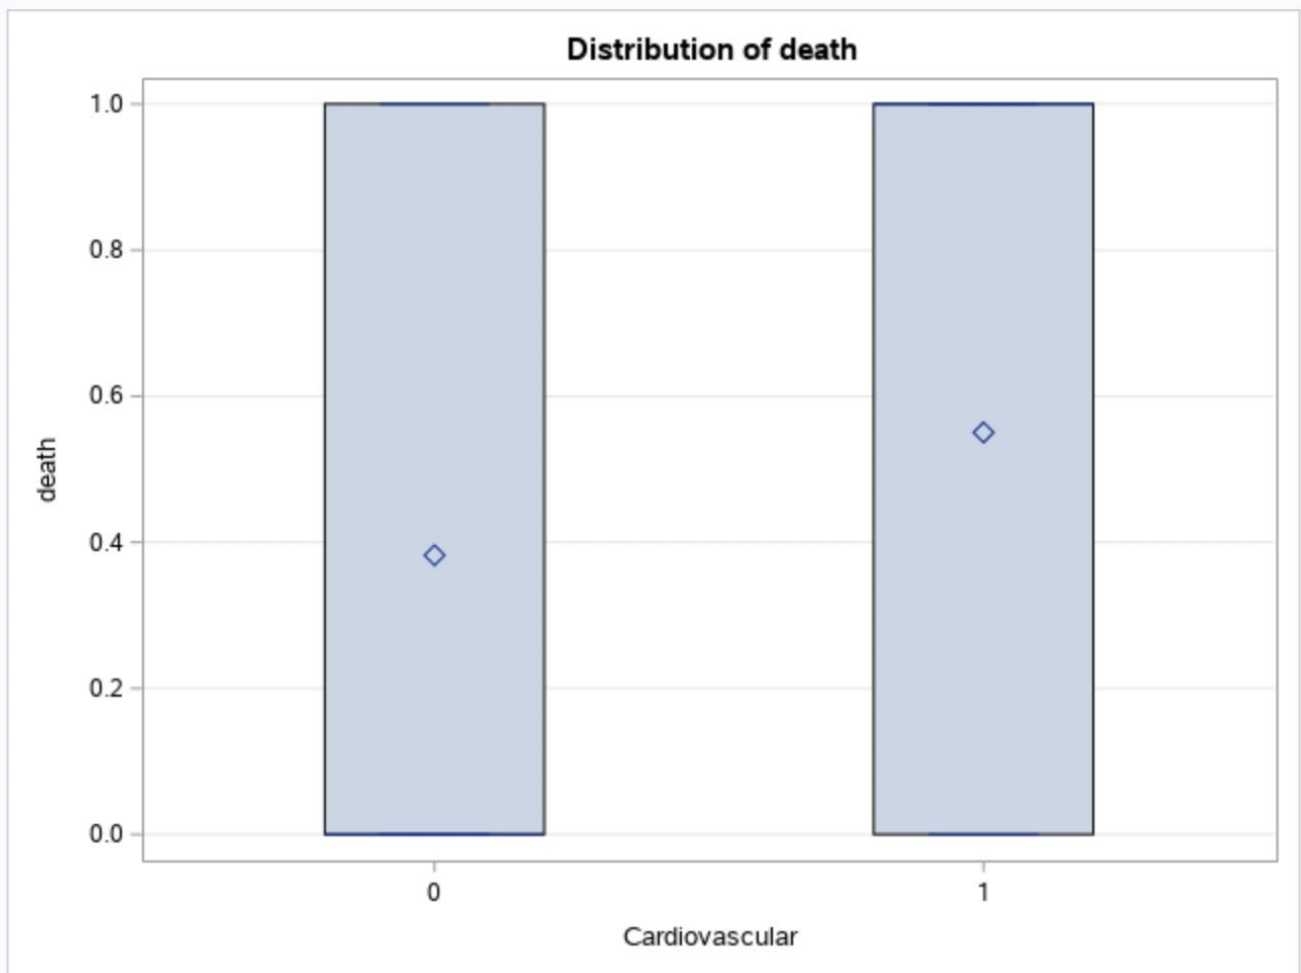

Supplementary Figure 13 Cardiovascular disease anova test

## 1.2 Code used to perform the Logistic Regression

```
LIBNAME mydata "/home/u49148566/" access=readonly;
DATA new; set home.covid_paciente; /*database released on May/15/2021*/

if cs_raca in (2,3,4,5) then cs_raca = 0; /*Raça não branca*/

if macro_regiao = 'S' THEN macro_regiao = 1;
if macro_regiao = 'N' THEN macro_regiao = 0;
macro_regiao1 = input(macro_regiao, 4.); /*casting the variable*/

/*We selected the patients that were between 14 and 100 years old*/
if idade_paciente >= 14 or idade_paciente >100;

/*Divided the patients between Age_less_50_years and Age_50_years_higher*/
if idade_paciente <=50 then idade_menor_40 = 1;
if idade_paciente > 50 then idade_maior_50 = 1;

/*The relative income means the inverse of the relative income. The higher that indicator, the worse the individual's economic condition.*/
renda_relational = 1-renda_relativa_p3;

/*Renaming the variables*/
RENAME evolucao = Death renal = Renal_disease macro_regiao1 = Region neurologic = Neurological_disease imunodepre = Immunosuppresions
hepatica = Liver_disease pneumopati = Pulmonary_disease cs_escol_n_analfabeto = Illiterate_patient idade_maior_60 = Age_50_years_higher
Obesidade = Obesity hematologi = Hematological_disease diabetes = Diabetes cs_sexo = Gender cardiopati = Cardiovascular_disease
cs_raca = Ethnicity idade_menor_40 = Age_less_50_years renda_relational = I_relative_income sind_down = Down_syndrome;

/*Applying the logistic regression*/
PROC LOGISTIC descending plots(only)=oddsratio(order = descending)simple ; /*range = (0,2)*/

class Ethnicity(ref='1') Gender(ref='F') Region(ref='1') / param=ref;

model Death = Age_50_years_higher Age_less_50_years Down_syndrome Region Neurological_disease Renal_disease Immunosuppresions
Liver_disease Pulmonary_disease Illiterate_patient Obesity Hematological_disease Diabetes Gender Cardiovascular_disease
Ethnicity I_relative_income / ctable;

run;
```
